# Supplementary material for: Effects of pH on pretreatment of sugarcane bagasse using aqueous imidazolium ionic liquids
Source: Royal Society of Chemistry journal article supplement (doi:10.1039/c2gc36084e), 2012-10-25
Supplement: c2gc36084e.pdf [file c2gc36084e.pdf]

**Effects of pH on pretreatment of sugarcane bagasse using aqueous imidazolium  
ionic liquids**

Zhanying Zhang,<sup>1,2\*</sup> Ian O'Hara<sup>1,2</sup> and William Doherty<sup>2</sup>

1. Syngenta Centre for Sugarcane Biofuels Development, Queensland University of  
Technology, Brisbane, Australia

2. Centre for Tropical Crops and Biocommodities, Queensland University of  
Technology, Brisbane, Australia

\*Corresponding author.

Postal address: GPO Box 2432, 2 George St, Brisbane, QLD 4001, Australia

Tel: +61 7 31387792; Fax: +61 7 3138 4132

Email: [jan.zhang@qut.edu.au](mailto:jan.zhang@qut.edu.au)

1    Supplementary Figure 1. SEM images of bagasse pretreated by aqueous BMIMCl  
2        solution with pH 0.4

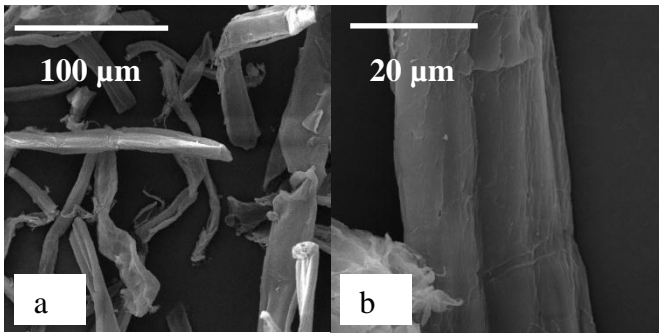

Supplementary Figure 1
